# Supplementary material for: Do Intestinal Unicellular Parasites Have a Role in the Inflammatory and Redox Status among the Severely Obese?
Source: MDPI journal article supplement (doi:10.3390/antiox11112090), 2022-10-23
Supplement: s1 [file s1]

**Table S1.** Anthropometric results by bioimpedance analysis in regards of colonization.

|                                      | Colonized |      | Non-colonized |      | T test |
|--------------------------------------|-----------|------|---------------|------|--------|
|                                      | Mean      | SD   | Mean          | SD   |        |
| BMI (kg/m <sup>2</sup> )             | 46.2      | 6.3  | 45.2          | 6.7  | Ns     |
| Abdominal circumference (cm)         | 132.7     | 13.3 | 128.7         | 14.2 | Ns     |
| FM%                                  | 50.1      | 4.9  | 50.3          | 5.2  | Ns     |
| FFM%                                 | 49.9      | 4.9  | 49.7          | 5.2  | Ns     |
| SKM%                                 | 27.8      | 2.9  | 27.7          | 3.2  | Ns     |
| Visceral fat area (cm <sup>2</sup> ) | 260.4     | 30.2 | 257.9         | 35.8 | Ns     |
| Phase angle                          | 5.3       | 0.7  | 5.4           | 0.7  | Ns     |

SD = standard deviation; BMI= body mass index; FM%: fat mass %; FFM%; fat free mass %, SKM%, skeletal muscle mass %; VFA: visceral fat area. Ns: no statistical differences found between groups.

**Table S2.** Daily intake of antioxidant nutrients clustered by colonization status.

|                | Colonized (n = 48) |              | Non-colonized (n = 49) |              | WT   |
|----------------|--------------------|--------------|------------------------|--------------|------|
|                | Median             | 1Q, 3Q       | Median                 | 1Q, 3Q       |      |
| Vitamin A (μg) | 702.0              | 536.0, 903.0 | 688.0                  | 484.8, 859.5 | 0.13 |
| Vitamin C (mg) | 87.3               | 58.3, 118.0  | 85.7                   | 57.9, 118.0  | 0.21 |
| Vitamin E (mg) | 5.5                | 4.0, 8.3     | 5.5                    | 3.6, 8.1     | 0.06 |
| ω3/ω6 ratio    | 0.17               | 0.13, 0.28   | 0.18                   | 0.13, .27    | 0.55 |
| Copper (mg)    | 1.2                | 0.9, 2.1     | 1.2                    | 0.9, 1.8     | 0.23 |
| Zinc (mg)      | 8.5                | 6.6, 11.2    | 8.0                    | 6.4, 10.5    | 0.06 |
| Manganese (mg) | 2.7                | 2.1, 6.5     | 2.6                    | 2.0, 5.4     | 0.37 |
| Selenium (μg)  | 104.0              | 77.6, 138.0  | 105.5                  | 77.9, 135.5  | 0.34 |

1Q, 3Q: first and third quartiles \*Statistically significant (p < 0.05) between groups. WT: Wilcoxon rank sum test.

**Table S3.** Redox parameters clustered in regards of the fulfilment of DRI of antioxidants.

|              | None<br>(n = 32) | Vitamin A<br>(n = 4) | Vitamin C<br>(n = 23) | Vitamin A + C<br>(n = 22) | Vitamin A+C+E<br>(n = 3) | KW T |
|--------------|------------------|----------------------|-----------------------|---------------------------|--------------------------|------|
| MDA (ng/mL)  | 418.3            | 450.0                | 401.2                 | 388.1                     | 431.7                    | Ns   |
| GSH/GSSG     | 0.38             | 0.48                 | 0.35                  | 0.37                      | 0.33                     | Ns   |
| TAC (mM)     | 3.31             | 3.59                 | 3.26                  | 3.24                      | 3.84                     | Ns   |
| SOD-3 (U/mL) | 1.47             | 1.41                 | 1.36                  | 1.48                      | 0.93                     | Ns   |
| NOX (μG/mL)  | 30.3             | 33.9                 | 37.4                  | 33.0                      | 27.0                     | Ns   |

KWT= Kruskal-Wallis test. Ns: no statistical differences found.
